# Supplementary material for: Development of stable and sensitive strip biosensors for the rapid detection of organophosphates and aflatoxin B1 in agricultural samples
Source: Royal Society of Chemistry journal article supplement (doi:10.1039/d4ay02229g), 2025-01-01
Supplement: d4ay02229g1.pdf [file d4ay02229g1.pdf]

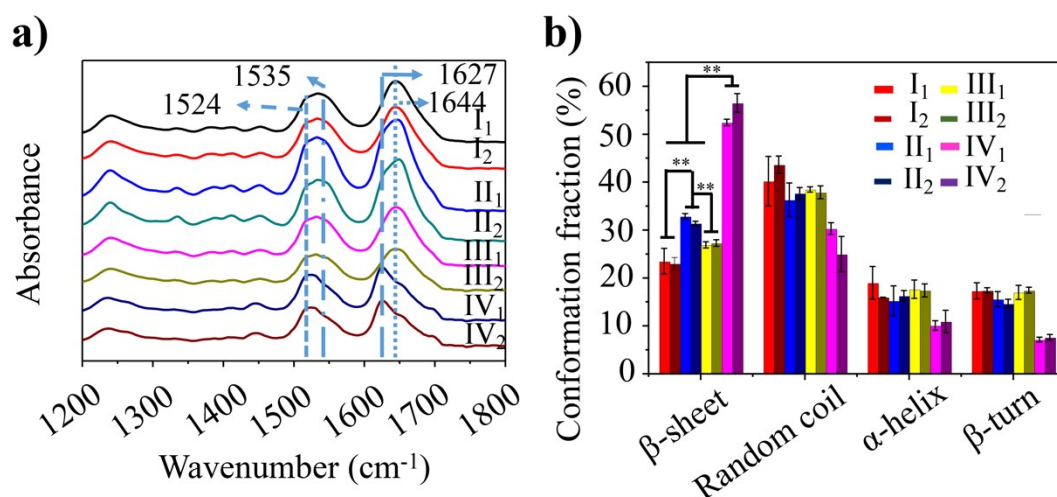

**Fig. 1.** FTIR spectra of silk films on pH test strips, with and without immobilized AChE. (1) The spectra without AChE; (2) The spectra with AChE. I: untreated, II: ultrasonic-treated, III: glycerol blend, IV: methanol-treated.
